# Supplementary material for: Experiential Virtual Scenarios With Real-Time Monitoring (Interreality) for the Management of Psychological Stress: A Block Randomized Controlled Trial
Source: PubMed Central journal article supplement (PMC4115267; doi:10.2196/jmir.3235), 2014-07-08
Supplement: jmir_v16i7e167_app3.pdf [file jmir_v16i7e167_app3.pdf]

### Multimedia Appendix 3.

Table 1. Study protocol for the experimental group.

|                    |                              |                                   |                                                |                                              |                                                                              |                                               |                                     |
|--------------------|------------------------------|-----------------------------------|------------------------------------------------|----------------------------------------------|------------------------------------------------------------------------------|-----------------------------------------------|-------------------------------------|
| Intake session     | Introduction of the training | Clinical interview (MINI)         | Give STAI Y2, PMS, PSS, COPE and SWLS          |                                              | Questionnaire about participants' expectations and motivations               | Explanation of how to use the PDA and the PMS |                                     |
| Session I          | Physiological assessment     | Give STAI Y1 and VAS-A (baseline) | Exposition to stressful virtual environment n1 | Give STAI Y1 and VAS-A (after each scenario) | Repeated for all the 7 stressful environments + neutral one + cognitive task | Exposition to a relaxing virtual environment  | Final debriefing                    |
| Assessment session |                              |                                   |                                                |                                              |                                                                              |                                               |                                     |
| Session II         | Preliminary phase            | Pre-training                      | Training                                       |                                              |                                                                              | Post-training                                 | Final phase                         |
| Training session   | Give STAI Y1 and VAS-A       | Physiological assessment          | Exposition to stressful virtual environment    | Cognitive restructuring                      | Exposition to a relaxing virtual environment                                 | Give STAI Y1 and VAS-A                        | Delivery of homework and debriefing |
| Session III        | Preliminary phase            | Pre-training                      | Training                                       |                                              |                                                                              | Post-training                                 | Final phase                         |
| Training session   | Give STAI Y1 and VAS-A       | Physiological assessment          | Exposition to stressful virtual environment    | Cognitive restructuring                      | Biofeedback in virtual reality                                               | Give STAI Y1 and VAS-A                        | Delivery of homework and debriefing |
| Session IV         | Preliminary phase            | Pre-training                      | Training                                       |                                              |                                                                              | Post-training                                 | Final phase                         |
| Training session   | Give STAI Y1 and VAS-A       | Physiological assessment          | Exposition to stressful virtual environment    | Cognitive restructuring                      | Exposition to a relaxing virtual environment                                 | Give STAI Y1 and VAS-A                        | Delivery of homework and debriefing |
| Session V          | Preliminary phase            | Pre-training                      | Training                                       |                                              |                                                                              | Post-training                                 | Final phase                         |
| Training session   | Give STAI Y1 and VAS-A       | Physiological assessment          | Exposition to stressful virtual                | Cognitive restructuring                      | Biofeedback in virtual reality                                               | Give STAI Y1 and VAS-A                        | Delivery of homework and            |

|                  |                                                          |                          |                          |                                                |                         |                                                                              |                        |                                     |
|------------------|----------------------------------------------------------|--------------------------|--------------------------|------------------------------------------------|-------------------------|------------------------------------------------------------------------------|------------------------|-------------------------------------|
|                  |                                                          |                          | environment              |                                                |                         |                                                                              | debriefing             |                                     |
| Session VI       | Preliminary phase                                        |                          | Pre-training             | Training                                       |                         |                                                                              | Post-training          | Final phase                         |
| Training session | Give STAI Y1 and VAS-A                                   |                          | Physiological assessment | Exposition to stressful virtual environment    | Cognitive restructuring | Exposition to a relaxing virtual environment                                 | Give STAI Y1 and VAS-A | Delivery of homework and debriefing |
| Session VII      | Preliminary phase                                        |                          | Pre-training             | Training                                       |                         |                                                                              | Post-training          | Final phase                         |
| Training session | Give STAI Y1 and VAS-A                                   |                          | Physiological assessment | Exposition to stressful virtual environment    | Cognitive restructuring | Biofeedback in virtual reality                                               | Give STAI Y1 and VAS-A | Delivery of homework and debriefing |
| Session VIII     | Preliminary phase                                        |                          | Pre-training             | Training                                       |                         |                                                                              | Post-training          | Final phase                         |
| Training session | Give STAI Y1 and VAS-A                                   |                          | Physiological assessment | Exposition to stressful virtual environment    | Cognitive restructuring | Exposition to a relaxing virtual environment                                 | Give STAI Y1 and VAS-A | Delivery of homework and debriefing |
| Session IX       | Preliminary phase                                        |                          | Pre-training             | Training                                       |                         |                                                                              | Post-training          | Final phase                         |
| Training session | Give STAI Y1 and VAS-A                                   |                          | Physiological assessment | Exposition to stressful virtual environment    | Cognitive restructuring | Biofeedback in virtual reality                                               | Give STAI Y1 and VAS-A | Delivery of homework and debriefing |
| Session X        | Follow up of questionnaires used in the evaluation phase | Physiological assessment | Give STAI Y1 and VAS-A   | Exposition to stressful virtual environment n1 | Give STAI Y1 and VAS-A  | Repeated for all the 7 stressful environments + neutral one + cognitive task | Final debriefing       |                                     |
| Final session    |                                                          |                          |                          |                                                |                         |                                                                              |                        |                                     |

Table 2. Study protocol for the control group.

|                |                              |                           |                                       |                                   |                                     |
|----------------|------------------------------|---------------------------|---------------------------------------|-----------------------------------|-------------------------------------|
| Intake session | Introduction of the training | Clinical interview (MINI) | Give STAI Y2, PMS, PSS, COPE and SWLS | Questionnaire about participants' | Explanation of how to use the diary |
|----------------|------------------------------|---------------------------|---------------------------------------|-----------------------------------|-------------------------------------|

|                    |                          |                                   |                                            |                                              |                                                                              |                                              |                                     |
|--------------------|--------------------------|-----------------------------------|--------------------------------------------|----------------------------------------------|------------------------------------------------------------------------------|----------------------------------------------|-------------------------------------|
|                    |                          |                                   |                                            |                                              | expectations and motivations                                                 |                                              |                                     |
| Session I          | Physiological assessment | Give STAI Y1 and VAS-A (baseline) | Guided imagery to stressful environment n1 | Give STAI Y1 and VAS-A (after each scenario) | Repeated for all the 7 stressful environments + neutral one + cognitive task | Exposition to a relaxing virtual environment | Final debriefing                    |
| Assessment session |                          |                                   |                                            |                                              |                                                                              |                                              |                                     |
| Session II         | Preliminary phase        | Pre-training                      | Training                                   |                                              |                                                                              | Post-training                                | Final phase                         |
| Training session   | Give STAI Y1 and VAS-A   | Physiological assessment          | Guided imagery to stressful environment    | Cognitive restructuring                      | Guided imagery to a relaxing environment                                     | Give STAI Y1 and VAS-A                       | Delivery of homework and debriefing |
| Session III        | Preliminary phase        | Pre-training                      | Training                                   |                                              |                                                                              | Post-training                                | Final phase                         |
| Training session   | Give STAI Y1 and VAS-A   | Physiological assessment          | Guided imagery to stressful environment    | Cognitive restructuring                      | Guided imagery to a relaxing environment                                     | Give STAI Y1 and VAS-A                       | Delivery of homework and debriefing |
| Session IV         | Preliminary phase        | Pre-training                      | Training                                   |                                              |                                                                              | Post-training                                | Final phase                         |
| Training session   | Give STAI Y1 and VAS-A   | Physiological assessment          | Guided imagery to stressful environment    | Cognitive restructuring                      | Guided imagery to a relaxing environment                                     | Give STAI Y1 and VAS-A                       | Delivery of homework and debriefing |
| Session V          | Preliminary phase        | Pre-training                      | Training                                   |                                              |                                                                              | Post-training                                | Final phase                         |
| Training session   | Give STAI Y1 and VAS-A   | Physiological assessment          | Guided imagery to stressful environment    | Cognitive restructuring                      | Guided imagery to a relaxing environment                                     | Give STAI Y1 and VAS-A                       | Delivery of homework and debriefing |

|                  |                                                          |                          |                          |                                                |                         |                                                                              |                                              |                                     |
|------------------|----------------------------------------------------------|--------------------------|--------------------------|------------------------------------------------|-------------------------|------------------------------------------------------------------------------|----------------------------------------------|-------------------------------------|
| Session VI       | Preliminary phase                                        |                          | Pre-training             | Training                                       |                         |                                                                              | Post-training                                | Final phase                         |
| Training session | Give STAI Y1 and VAS-A                                   |                          | Physiological assessment | Guided imagery to stressful environment        | Cognitive restructuring | Guided imagery to a relaxing environment                                     | Give STAI Y1 and VAS-A                       | Delivery of homework and debriefing |
| Session VII      | Preliminary phase                                        |                          | Pre-training             | Training                                       |                         |                                                                              | Post-training                                | Final phase                         |
| Training session | Give STAI Y1 and VAS-A                                   |                          | Physiological assessment | Guided imagery to stressful environment        | Cognitive restructuring | Guided imagery to a relaxing environment                                     | Give STAI Y1 and VAS-A                       | Delivery of homework and debriefing |
| Session VIII     | Preliminary phase                                        |                          | Pre-training             | Training                                       |                         |                                                                              | Post-training                                | Final phase                         |
| Training session | Give STAI Y1 and VAS-A                                   |                          | Physiological assessment | Guided imagery to stressful environment        | Cognitive restructuring | Guided imagery to a relaxing environment                                     | Give STAI Y1 and VAS-A                       | Delivery of homework and debriefing |
| Session IX       | Preliminary phase                                        |                          | Pre-training             | Training                                       |                         |                                                                              | Post-training                                | Final phase                         |
| Training session | Give STAI Y1 and VAS-A                                   |                          | Physiological assessment | Guided imagery to stressful environment        | Cognitive restructuring | Guided imagery to a relaxing environment                                     | Give STAI Y1 and VAS-A                       | Delivery of homework and debriefing |
| Session X        | Follow up of questionnaires used in the evaluation phase | Physiological assessment | Give STAI Y1 and VAS-A   | Guided imagery to stressful environment<br>n 1 | Give STAI Y1 and VAS-A  | Repeated for all the 7 stressful environments + neutral one + cognitive task | Exposition to a relaxing virtual environment | Final debriefing                    |
| Final session    |                                                          |                          |                          |                                                |                         |                                                                              |                                              |                                     |
